# Supplementary material
Source: publisher figshare collection journal article supplement (https://aacr.figshare.com/articles/dataset/_/23145151)
Supplement: Supplementary file 1 [file 40851445]

(1)

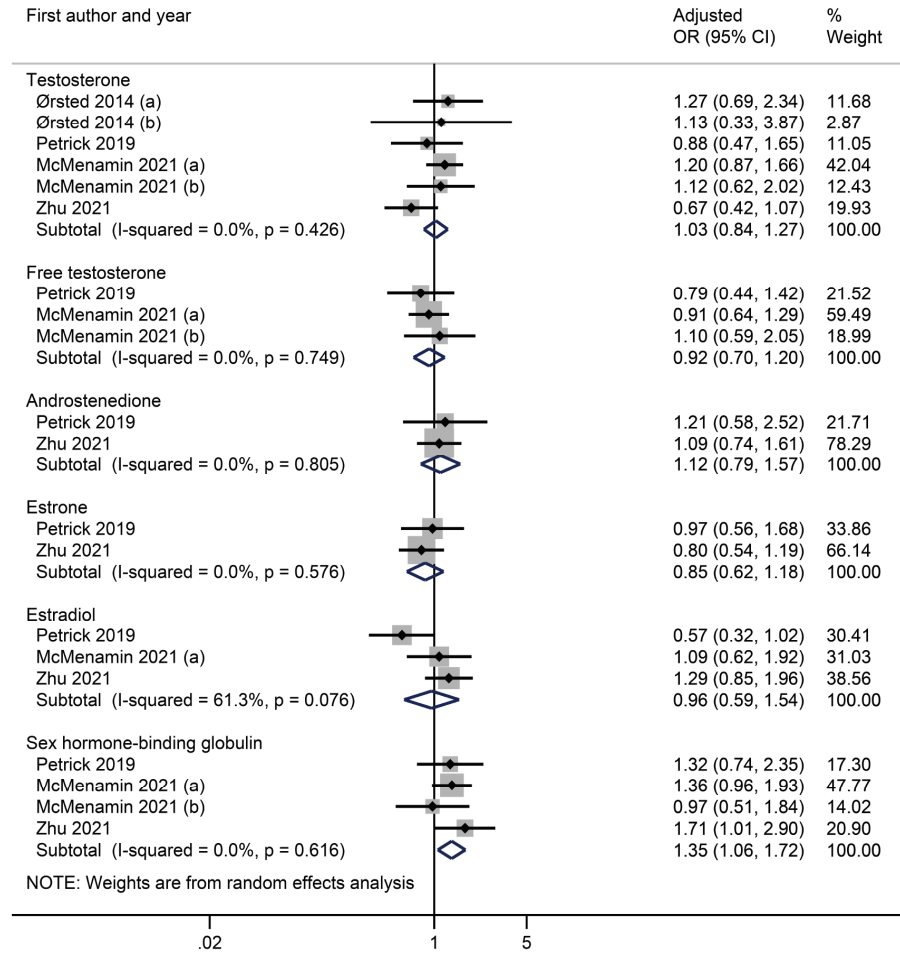

(2)

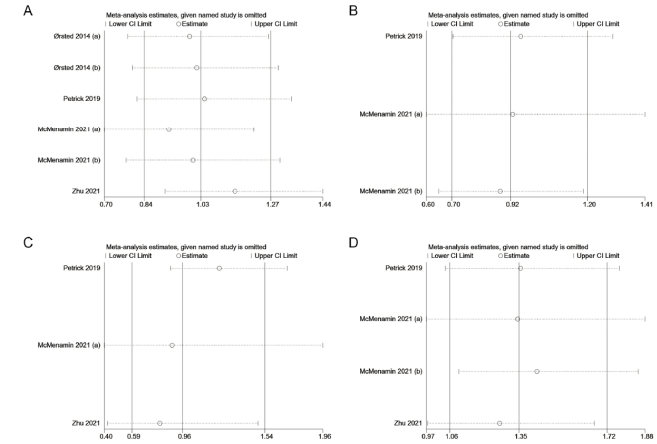

(3)

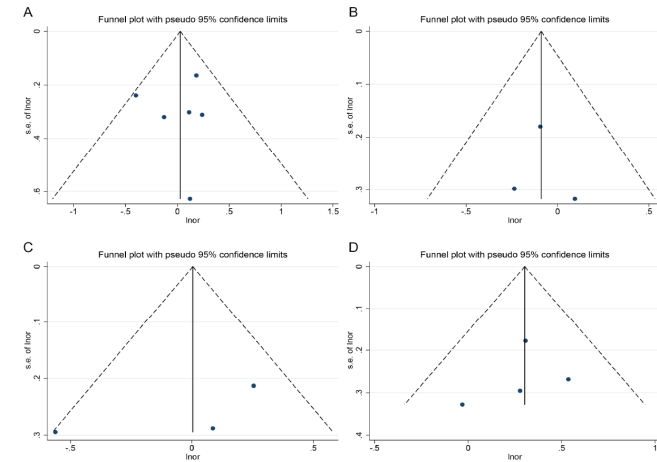

**Supplementary Figure S2. Forest plots (1), sensitivity analysis (2) and funnel plots (3) of the associations between prediagnostic circulating sex hormone levels and gastric cancer risk. (a) male; (b) female. (A) testosterone; (B) free testosterone; (C) estradiol; (D) sex hormone-binding globulin.**
